# Supplementary material for: Exercise Mitigates the Loss of Muscle Mass by Attenuating the Activation of Autophagy during Severe Energy Deficit
Source: Nutrients. 2019 Nov 19;11(11):2824. doi: 10.3390/nu11112824 (PMC6893734; doi:10.3390/nu11112824)
Supplement: Supplementary file 1 [file nutrients-11-02824-s001.pdf]

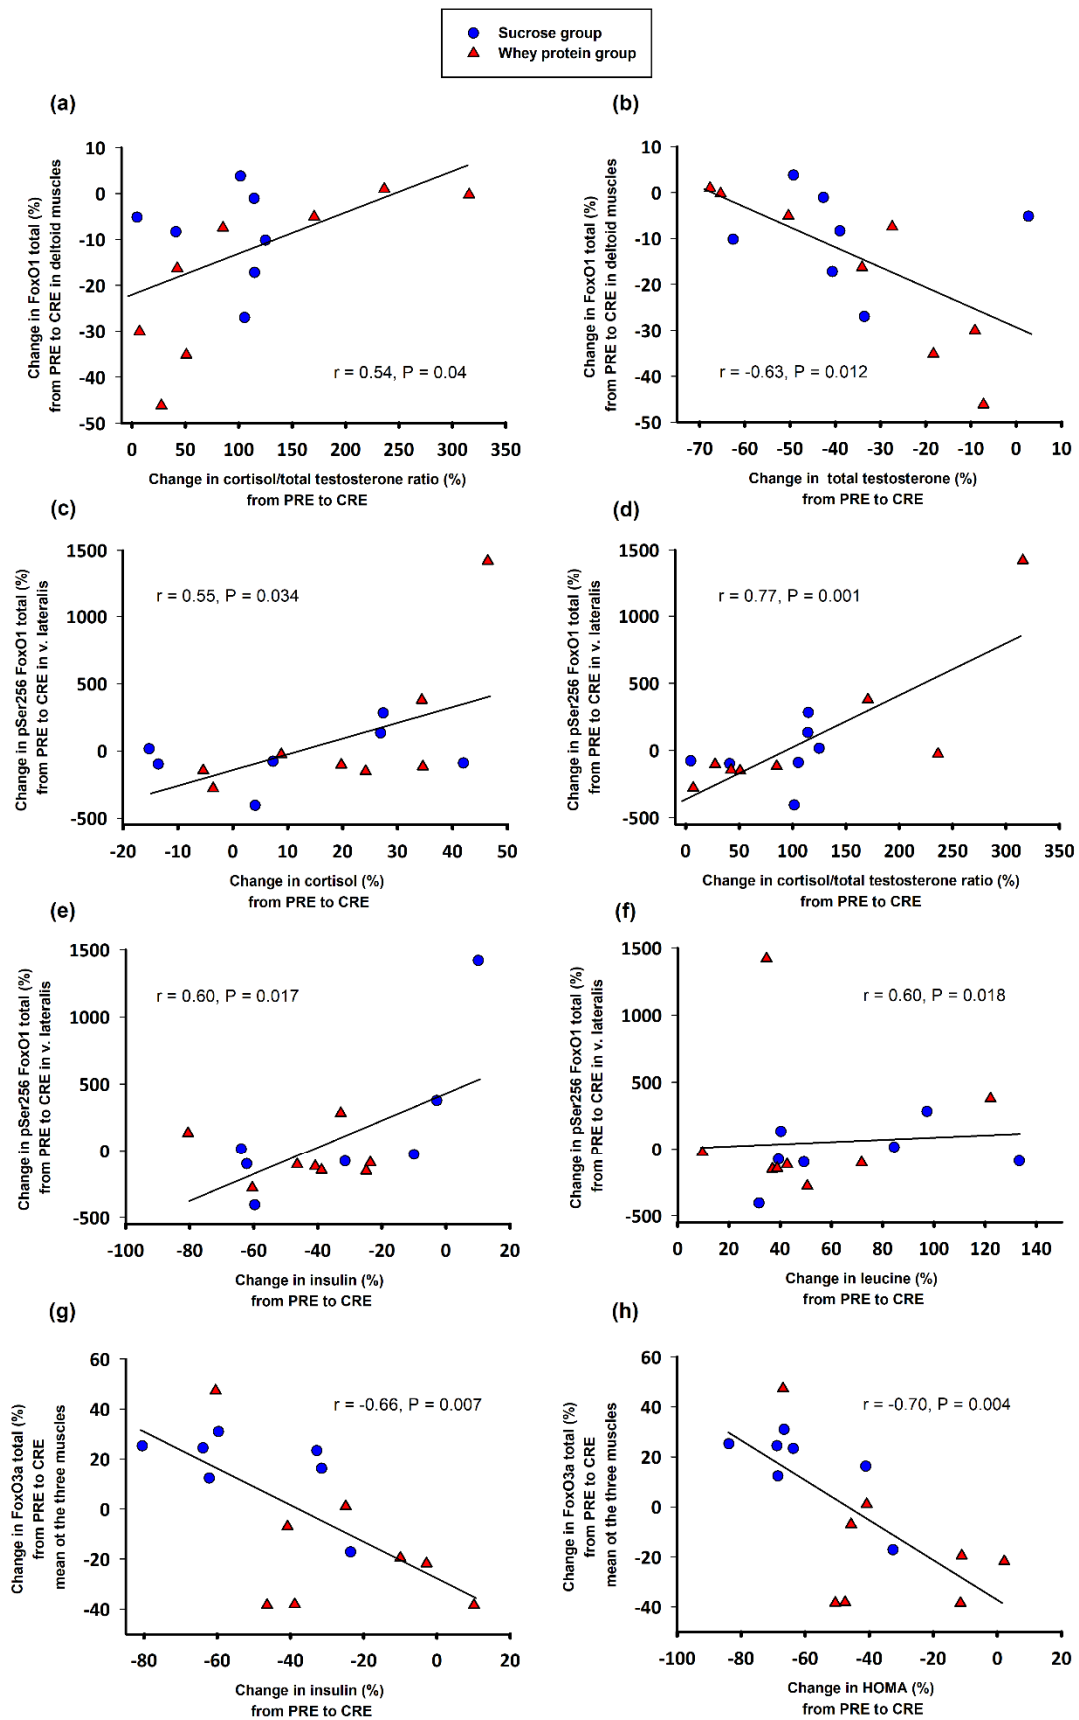

**Figure S1.** Correlations between changes in signaling and hormones or amino acids for subjects in the sucrose and whey protein groups.  $n = 7$  and  $n = 8$  for the sucrose and whey protein groups, respectively. Deltoid muscles = mean of both arms.

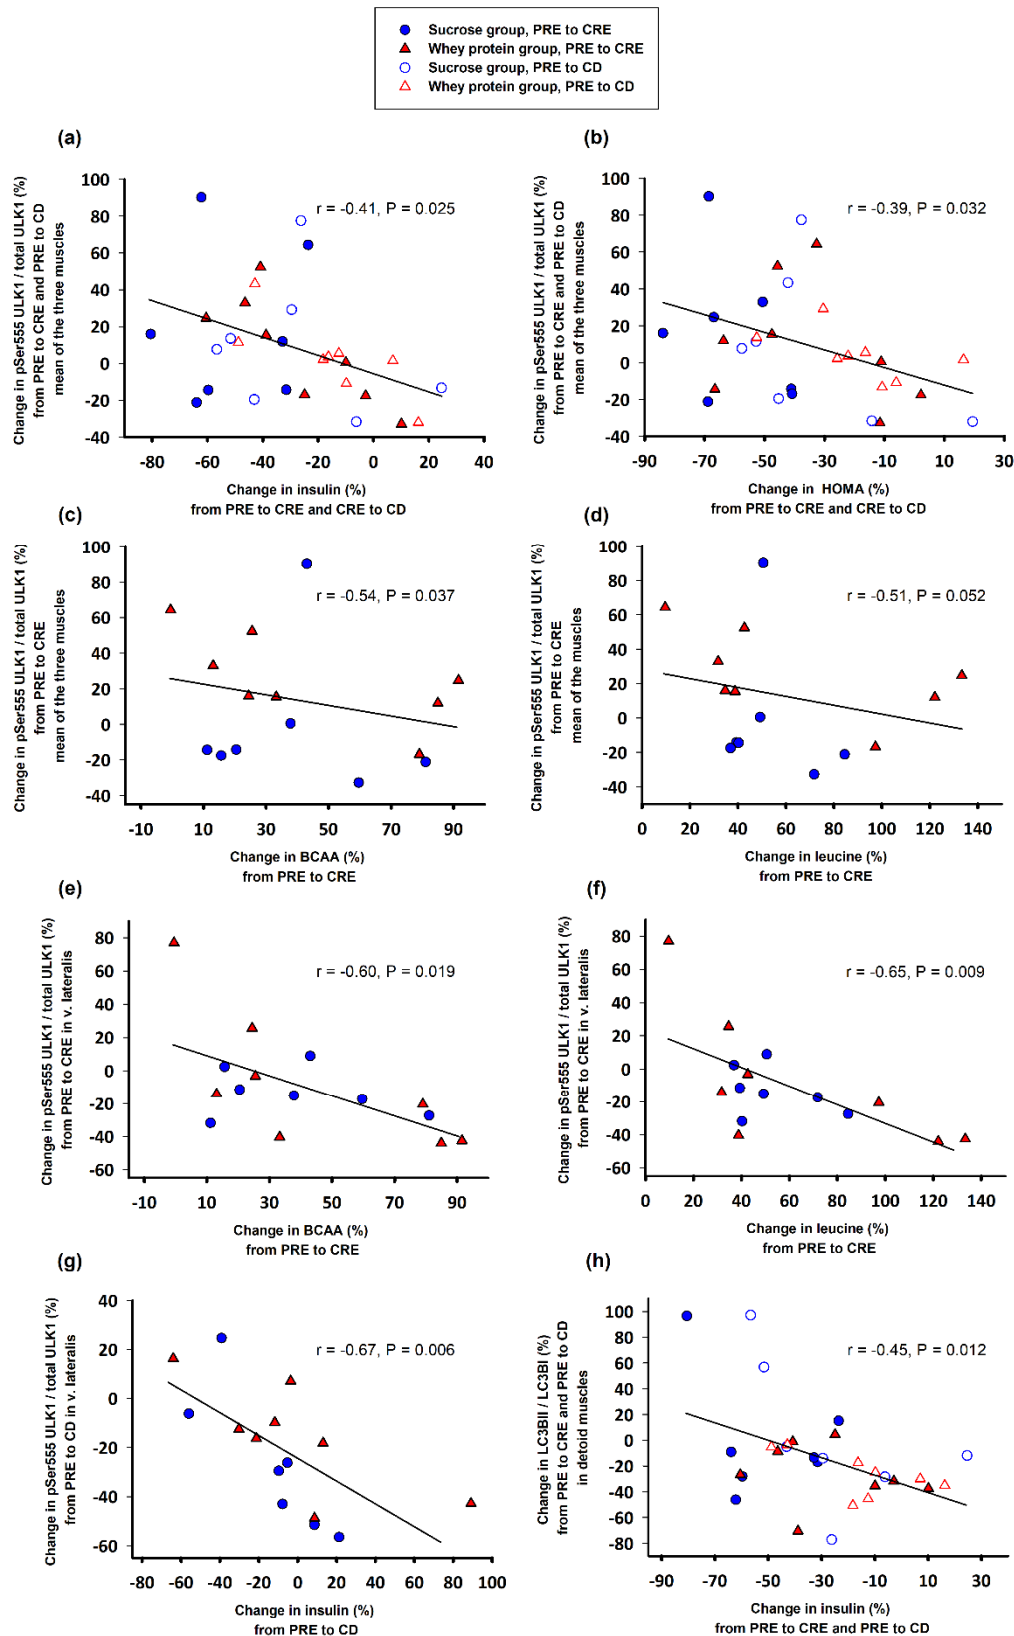

**Figure S2.** Correlations between changes in signaling and hormones or amino acids from PRE to CRE ( $n = 7$  and  $n = 8$  for sucrose and whey protein groups, respectively). In a, b, and h correlations from PRE to CRE and PRE to CD are combined ( $n = 30$ ). Deltoid muscles = mean of both arms.
